# Supplementary material
Source: PubMed Central journal article supplement (PMC3064377)
Supplement: 1018776108_pnas.201018776SI.pdf [file 1018776108_pnas.201018776SI.pdf]

# Supporting Information

Koh et al. 10.1073/pnas.1018776108

**Table S1. Closed canopy oil-palm plantations in the lowlands of Peninsular Malaysia, Borneo, and Sumatra, differentiated by the soil type on which plantations occur**

| Region/subregion    | Oil-palm plantations, ha |                |           | Total land area, ha |
|---------------------|--------------------------|----------------|-----------|---------------------|
|                     | Mineral soil             | Peat soil      | Total     |                     |
| Peninsular Malaysia | 1,769,013 (88.2)*        | 236,820 (11.8) | 2,005,833 | 11,322,358          |
| Borneo              | 2,199,569 (92.5)         | 177,191 (7.5)  | 2,376,760 | 59,437,156          |
| Sarawak             | 254,075 (71)             | 103,841 (29)   | 357,915   | 9,392,068           |
| Sabah               | 888,573 (96.7)           | 30,166 (3.3)   | 918,739   | 5,384,366           |
| West Kalimantan     | 248,161 (90.6)           | 25,611 (9.4)   | 273,772   | 13,219,483          |
| Central Kalimantan  | 477,248 (96.5)           | 17,542 (3.5)   | 494,789   | 14,436,472          |
| South Kalimantan    | 212,274 (100)            | 0              | 212,274   | 3,574,524           |
| East Kalimantan     | 119,239 (100)            | 31 (<0.1)      | 119,270   | 13,430,243          |
| Sumatra             | 3,407,285 (88)           | 464,554 (12)   | 3,871,839 | 34,033,563          |
| Aceh                | 136,182 (93.4)           | 9,696 (6.6)    | 145,878   | 3,060,592           |
| North Sumatra       | 984,207 (90)             | 108,826 (10)   | 1,093,033 | 4,010,762           |
| Riau                | 1,246,557 (83.8)         | 241,830 (16.2) | 1,488,386 | 8,965,788           |
| West Sumatra        | 140,039 (81.4)           | 32,023 (18.6)  | 172,063   | 1,992,865           |
| Jambi               | 261,035 (90.6)           | 27,057 (9.4)   | 288,092   | 3,896,060           |
| Bengkulu            | 111,780 (87.4)           | 16,139 (12.6)  | 127,919   | 1,297,330           |
| South Sumatra       | 398,806 (95.2)           | 19,984 (4.8)   | 418,790   | 7,876,388           |
| Lampung             | 128,679 (93.5)           | 8,998 (6.5)    | 137,678   | 2,933,776           |
| Total study region  | 7,375,866 (89.4)         | 878,565 (10.6) | 8,254,431 | 104,793,076         |

\*Number in parentheses indicates percentage of total oil-palm area of region/subregion.

**Table S2. Composition of peatlands in the lowlands of Peninsular Malaysia, Borneo, and Sumatra**

| Region/subregion    | Peatland area, ha           |                  |                |                         |                   |            |
|---------------------|-----------------------------|------------------|----------------|-------------------------|-------------------|------------|
|                     | Peatswamp forest            | Regrowth forest* | Mosaic*        | Closed canopy oil palm* | Cleared peatland* | Total      |
| Peninsular Malaysia | 234,252 (26.8) <sup>†</sup> | 123,339 (14.1)   | 174,580 (19.9) | 236,820 (27.1)          | 106,246 (12.1)    | 875,237    |
| Borneo              | 3,137,943 (43.6)            | 1,904,728 (26.5) | 782,607 (10.9) | 177,191 (2.5)           | 1,198,244 (16.6)  | 7,200,713  |
| Sarawak             | 397,011 (27.5)              | 453,443 (31.4)   | 193,250 (13.4) | 103,841 (7.2)           | 294,697 (20.4)    | 1,442,243  |
| Sabah               | 38,859 (20.9)               | 49,490 (26.6)    | 27,051 (14.5)  | 30,166 (16.2)           | 40,461 (21.7)     | 186,027    |
| West Kalimantan     | 1,029,497 (61.9)            | 329,182 (19.8)   | 119,039 (7.2)  | 25,611 (1.5)            | 159,288 (9.6)     | 1,662,618  |
| Central Kalimantan  | 1,434,715 (48.6)            | 776,905 (26.3)   | 317,754 (10.8) | 17,542 (0.6)            | 404,433 (13.7)    | 2,951,349  |
| South Kalimantan    | 3,496 (1.2)                 | 87,757 (28.9)    | 50,761 (16.7)  | (0)                     | 161,899 (53.3)    | 303,914    |
| East Kalimantan     | 234,365 (35.8)              | 207,949 (31.8)   | 74,752 (11.4)  | 31 (<0.01)              | 137,466 (21)      | 654,563    |
| Sumatra             | 1,836,637 (27.5)            | 2,585,002 (38.8) | 813,976 (12.2) | 464,554 (7)             | 968,460 (14.5)    | 6,668,629  |
| Aceh                | 98,488 (45)                 | 81,376 (37.2)    | 18,613 (8.5)   | 9,696 (4.4)             | 10,712 (4.9)      | 218,886    |
| North Sumatra       | 24,271 (8.4)                | 64,707 (22.4)    | 55,672 (19.2)  | 108,826 (37.6)          | 35,781 (12.4)     | 289,257    |
| Riau                | 1,407,627 (36)              | 1,362,187 (34.8) | 445,766 (11.4) | 241,830 (6.2)           | 454,889 (11.6)    | 3,912,299  |
| West Sumatra        | 16,277 (10.3)               | 44,922 (28.4)    | 31,980 (20.2)  | 32,023 (20.3)           | 32,752 (20.7)     | 157,955    |
| Jambi               | 164,124 (28.7)              | 236,365 (41.3)   | 74,048 (12.9)  | 27,057 (4.7)            | 70,895 (12.4)     | 572,489    |
| Bengkulu            | 692 (1.5)                   | 10,955 (23.7)    | 11,796 (25.5)  | 16,139 (34.9)           | 6,699 (14.5)      | 46,281     |
| South Sumatra       | 122,909 (8.8)               | 768,237 (54.9)   | 170,143 (12.2) | 19,984 (1.4)            | 317,679 (22.7)    | 1,398,953  |
| Lampung             | 2,250 (3.1)                 | 16,252 (22.4)    | 5,957 (8.2)    | 8,998 (12.4)            | 39,052 (53.9)     | 72,509     |
| Total study region  | 5,208,832 (35.3)            | 4,613,069 (31.3) | 1,771,163 (12) | 878,565 (6)             | 2,272,950 (15.4)  | 14,744,579 |

\*Regrowth forest refers to closed canopy plantations (excluding oil palm) and natural secondary forests; mosaic refers to mosaic of closed canopy vegetation and open areas comprising croplands, agroforests, and small forest patches; closed canopy oil palm refers to large scale, mature oil-palm monoculture; cleared peatland refers to open areas covered by remnants of original vegetation, sparse grass/shrublands, transitional agricultural areas, and extremely degraded areas.

<sup>†</sup>Number in parentheses indicates percentage of total peatland area of region/subregion.

**Table S3. Projected biodiversity outcomes of land-use transition scenarios for cleared peatlands in Peninsular Malaysia, Borneo, and Sumatra**

| Region/subregion    | Oil-palm establishment, % | Mosaic regrowth, %  | Forest regrowth, %   |
|---------------------|---------------------------|---------------------|----------------------|
| Peninsular Malaysia | -1.6 ( $\pm 0.005$ )*     | 0.7 ( $\pm 0.009$ ) | 1.8 ( $\pm 0.008$ )  |
| Borneo              | -2.1 ( $\pm 0.007$ )      | 0.9 ( $\pm 0.011$ ) | 2.4 ( $\pm 0.011$ )  |
| Sarawak             | -2.9 ( $\pm 0.01$ )       | 1.2 ( $\pm 0.016$ ) | 3.4 ( $\pm 0.015$ )  |
| Sabah               | -3.2 ( $\pm 0.011$ )      | 1.4 ( $\pm 0.018$ ) | 3.8 ( $\pm 0.017$ )  |
| West Kalimantan     | -1.1 ( $\pm 0.004$ )      | 0.4 ( $\pm 0.006$ ) | 1.2 ( $\pm 0.005$ )  |
| Central Kalimantan  | -1.7 ( $\pm 0.006$ )      | 0.7 ( $\pm 0.009$ ) | 1.9 ( $\pm 0.009$ )  |
| South Kalimantan    | -12.4 ( $\pm 0.042$ )     | 8.9 ( $\pm 0.089$ ) | 19.9 ( $\pm 0.097$ ) |
| East Kalimantan     | -2.8 ( $\pm 0.01$ )       | 1.2 ( $\pm 0.016$ ) | 3.3 ( $\pm 0.015$ )  |
| Sumatra             | -2.1 ( $\pm 0.007$ )      | 0.9 ( $\pm 0.012$ ) | 2.5 ( $\pm 0.011$ )  |
| Aceh                | -0.6 ( $\pm 0.002$ )      | 0.2 ( $\pm 0.003$ ) | 0.7 ( $\pm 0.003$ )  |
| North Sumatra       | -2 ( $\pm 0.006$ )        | 1.0 ( $\pm 0.011$ ) | 2.4 ( $\pm 0.01$ )   |
| Riau                | -1.6 ( $\pm 0.005$ )      | 0.6 ( $\pm 0.009$ ) | 1.8 ( $\pm 0.008$ )  |
| West Sumatra        | -3.5 ( $\pm 0.011$ )      | 1.7 ( $\pm 0.02$ )  | 4.3 ( $\pm 0.019$ )  |
| Jambi               | -1.8 ( $\pm 0.006$ )      | 0.7 ( $\pm 0.01$ )  | 2.1 ( $\pm 0.01$ )   |
| Bengkulu            | -2.8 ( $\pm 0.009$ )      | 1.7 ( $\pm 0.017$ ) | 3.6 ( $\pm 0.016$ )  |
| South Sumatra       | -4.5 ( $\pm 0.015$ )      | 2.1 ( $\pm 0.026$ ) | 6 ( $\pm 0.028$ )    |
| Lampung             | -10.3 ( $\pm 0.034$ )     | 5.8 ( $\pm 0.064$ ) | 14.8 ( $\pm 0.067$ ) |
| Total study region  | -2.1 ( $\pm 0.007$ )      | 0.9 ( $\pm 0.011$ ) | 2.4 ( $\pm 0.011$ )  |

\*Number in parentheses indicates SE. Projected change in biodiversity (percentage of bird species) is relative to current remaining biodiversity; modeled based on a matrix-calibrated species-area model (1, 2). Land-use transition scenarios are oil-palm establishment (cleared peatland to oil palm), mosaic regrowth (cleared peatland to mosaic), and forest regrowth (cleared peatland to regrowth forest).

1. Koh LP, Ghazoul J (2010) A matrix-calibrated species-area model for predicting biodiversity losses due to land-use change. *Conserv Biol* 24:994–1001.
2. Koh LP, Lee TM, Sodhi NS, Ghazoul J (2010) An overhaul of the species-area approach for predicting biodiversity loss: Incorporating matrix and edge effects. *J Appl Ecol* 47:1063–1070.
